# Supplementary material
Source: PubMed Central journal article supplement (PMC5568808)
Supplement: NIHMS890545-supplement-1.pdf [file NIHMS890545-supplement-1.pdf]

## **Supplemental Information**

### **Hypoxia-sensitive COMMD1 Integrates Signaling and Cellular Metabolism in Human Macrophages and Suppresses Osteoclastogenesis**

Koichi Murata, Celestia Fang, Chikashi Terao, Eugenia G Giannopoulou, Ye Ji Lee, Min Joon Lee, Se-Hwan Mun, Seyeon Bae, Ruoxi Yuan, Yu Qiao, Moritoshi Furu, Hiromu Ito, Koichiro Ohmura, Shuichi Matsuda, Tsuneyo Mimori, Fumihiko Matsuda, Kyung-Hyun Park-Min, and Lionel B. Ivashkiv

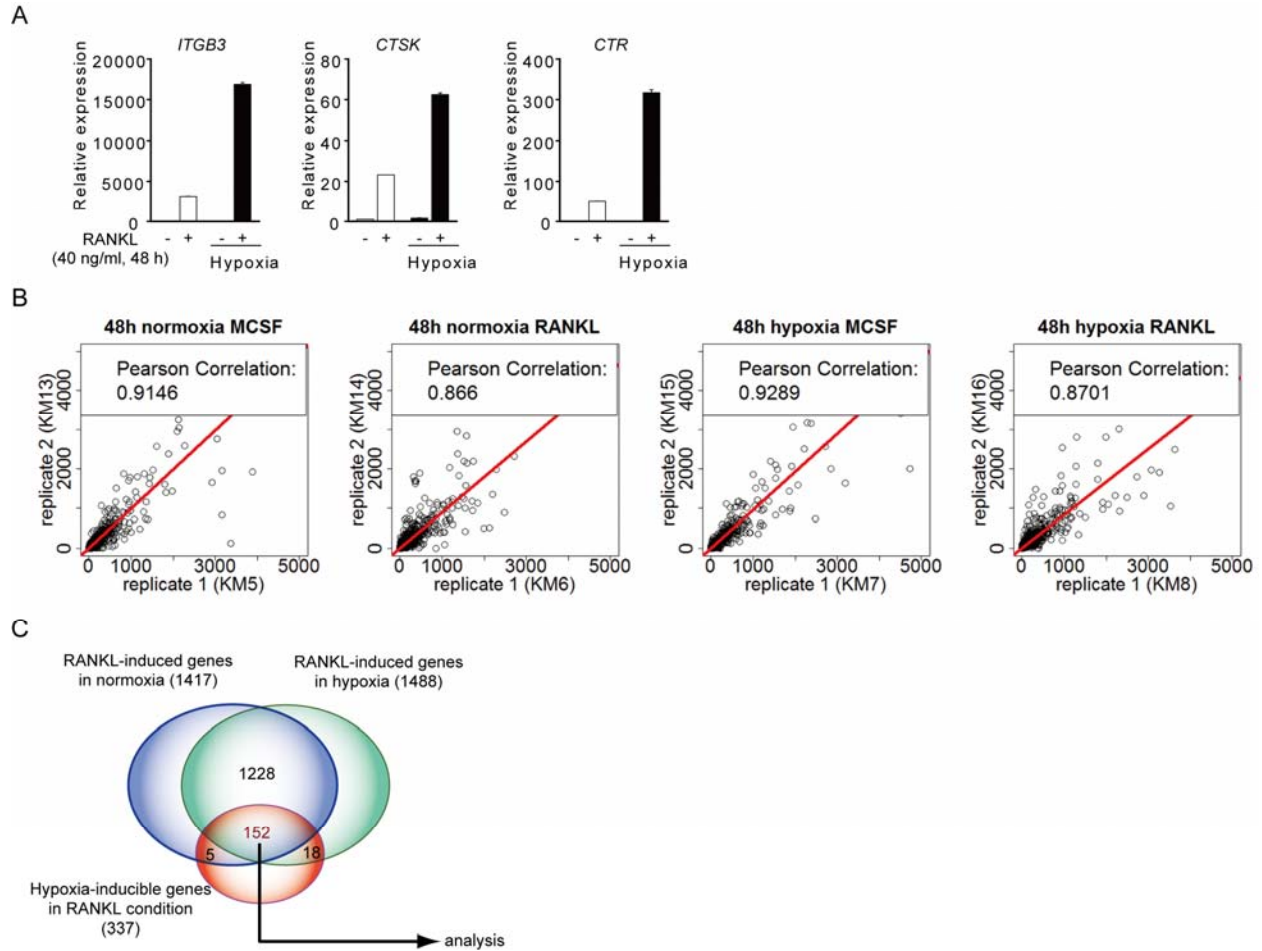

Murata et al. Figure S1

**Supplementary Figure 1. Hypoxia enhances osteoclastogenesis**, Related to Figure 1  
 (A) RT-qPCR analysis of *ITGB3*, *CTSK* and *CTR* mRNA normalized relative to *TBP* mRNA.  
 (B) Pearson correlation analysis of RNAseq (48 h of RANKL treatment) data obtained from two independent donors.  
 (C) Venn diagram of RANKL-induced and hypoxia-regulated genes, made from two pooled RNA-seq experiments.  
 Bar graphs show means and error bars represent SEM. The result (A) is representative of at least 3 experiments

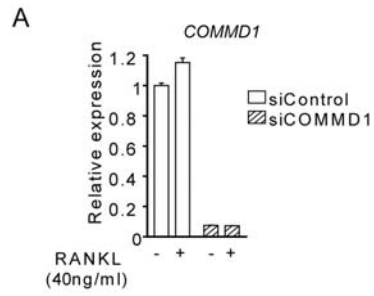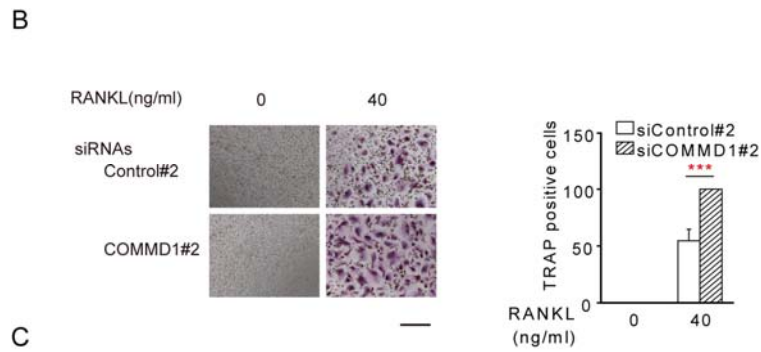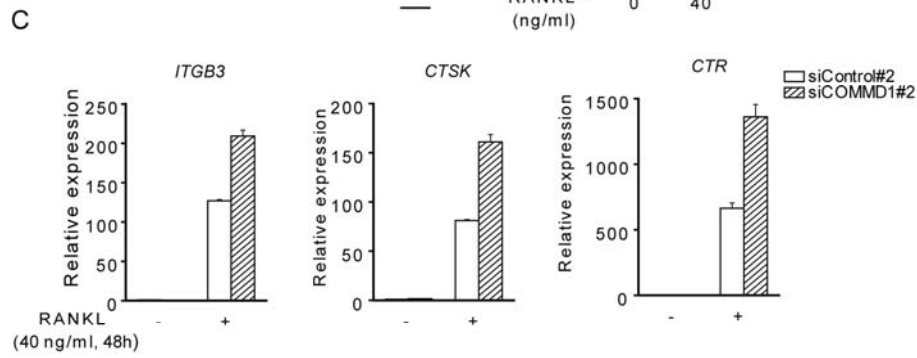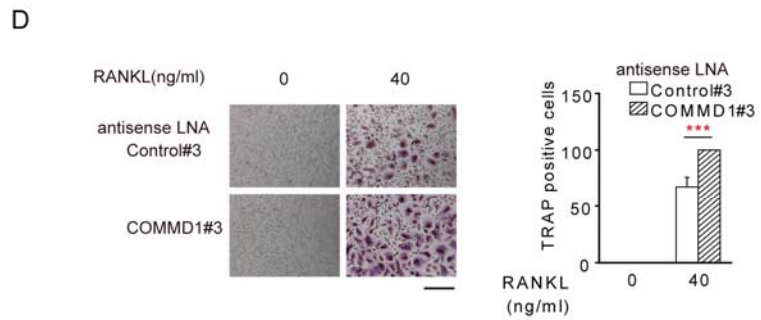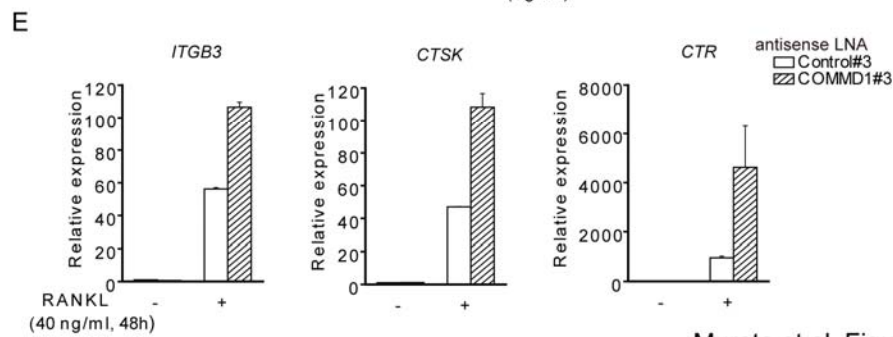

Murata et al. Figure S2

**Supplementary Figure 2. COMMD1 is a negative regulator of osteoclastogenesis, Related to Figure 2.**

(A) RT-qPCR analysis of *COMMD1* mRNA normalized relative to *TBP* mRNA.

(B) TRAP staining of human osteoclasts nucleofected with a different set of control or COMMD1-specific siRNAs. Right panel shows pooled data from 7 experiments with different donors normalized relative to the number of osteoclasts obtained using COMMD1 siRNA#2 with RANKL (40 ng/ml) (set at 100%).

(C) RT-qPCR analysis of *ITGB3*, *CTSK* and *CTR* mRNA normalized relative to *TBP* mRNA.

(D) TRAP staining of human osteoclasts nucleofected with COMMD1-specific antisense locked nucleic acids (LNA) or control LNA. Right panel shows pooled data from 4 experiments with different donors normalized relative to the number of osteoclasts obtained using COMMD1 LNA#3 with RANKL (40 ng/ml) (set at 100%).

(E) RT-qPCR analysis of *ITGB3*, *CTSK* and *CTR* mRNA normalized relative to *TBP* mRNA.

Bar graphs show means and error bars represent SEM. \*\*\*  $p < 0.001$ . Bar, 200  $\mu\text{m}$ . The results are representative of at least 3 (A, C, E), 7 (B), and 4 (D) experiments.

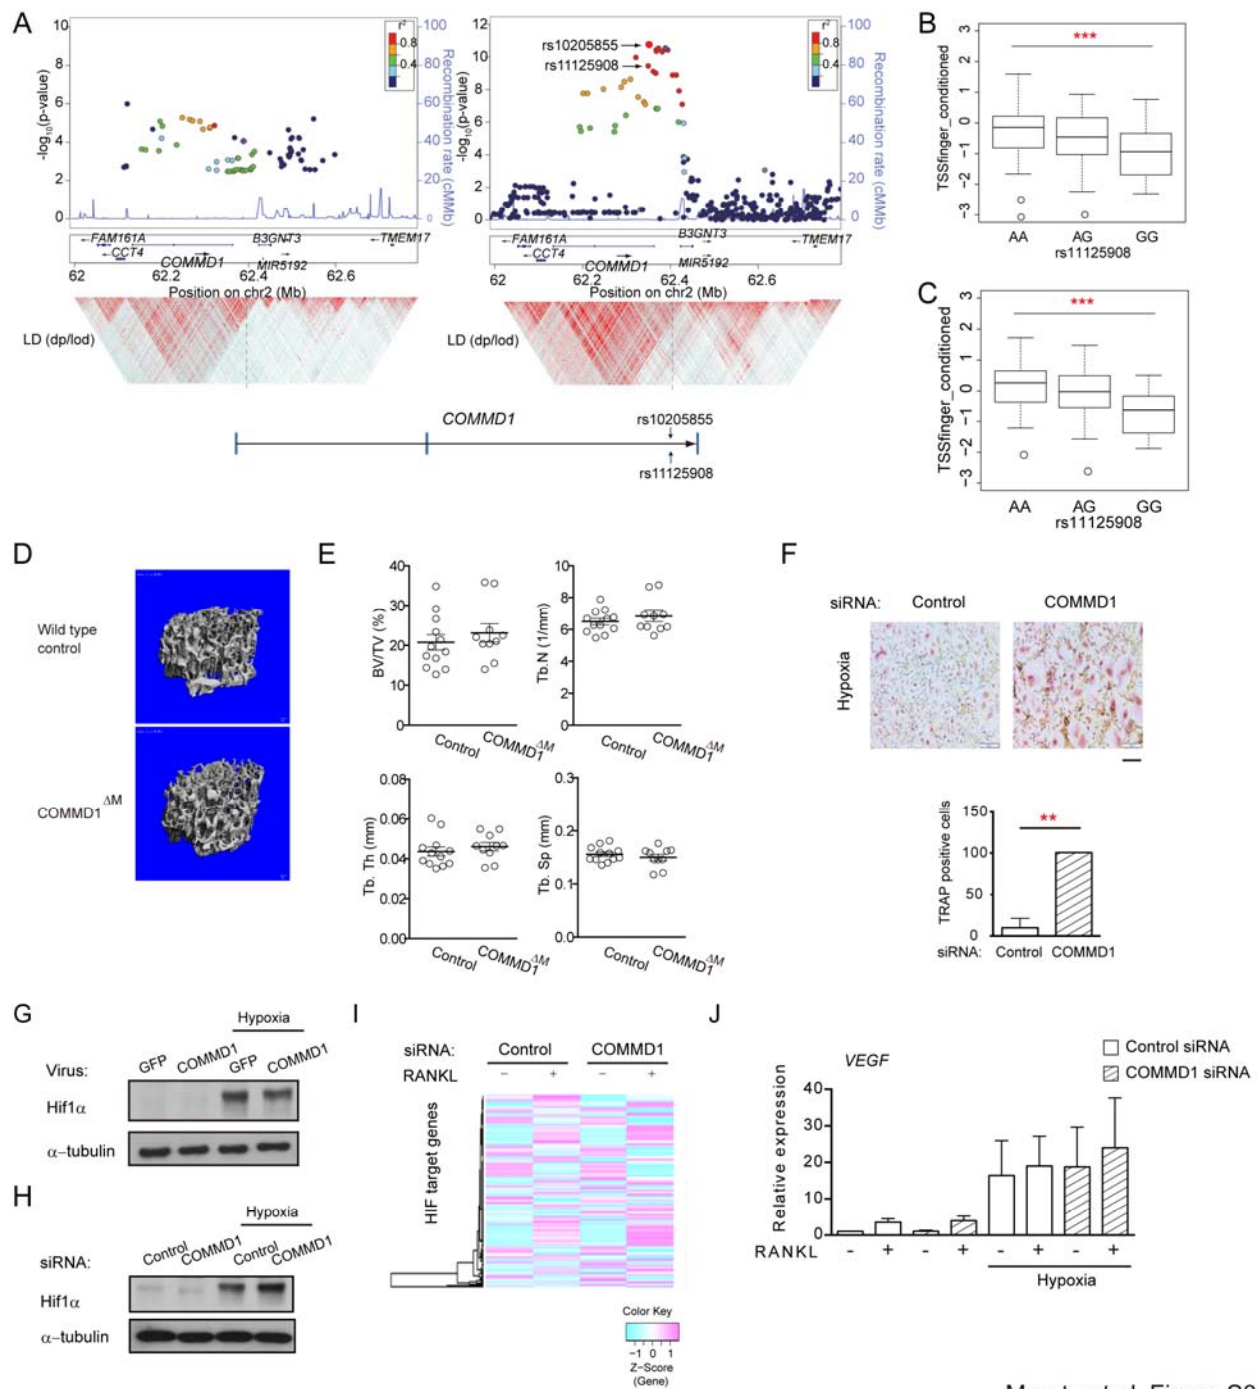

Murata et al. Figure S3

**Supplementary Figure 3. COMMD1 and bone resorption in RA patients and mouse models, Related to Figure 3**

(A) Expression quantitative trait loci (eQTL) associations and similar linkage disequilibrium (LD) structure in European and Japanese populations. Variants' locations and eQTL p-values are shown in European and Japanese populations for upper left and right panels, respectively. The purple circles in the two panels indicate rs1466124 showing significant associations in the two populations. LD structures are

drawn based on the 1000 Genomes data or the previous Japanese study for European and Japanese populations, respectively. The locations of rs10205855 and rs11125908 in COMMD1 region are indicated in the lower panel.

(B) Total Sharp score (TSS) in finger joints adjusted by RF positivity and rs11125908

(C) TSS in finger joints adjusted by RF level and rs11125908

The boxes represent the 25th to 75th percentiles (upper and lower quartiles (UQ and LQ), respectively) and the lines within the boxes represent the median. The lines outside the boxes represent the smallest value bigger than 1.5\*inner quartile range (IQR, UQ-LQ) below LQ and the biggest value smaller than 1.5\*IQR above UQ. Symbols indicate outliers.

(D-E) Myeloid COMMD1 deficiency does not affect basal bone phenotype in mice. Microcomputed tomography and bone parameters of epiphyseal region of the femurs of 12-week-old wild type control and COMMD1<sup>-/-</sup> mice. n = 10–12 from 3 experiments. Bar graphs show means and error bars represent SEM.

(F) Human monocytes under hypoxic conditions were nucleofected with control or COMMD1 siRNAs and were cultured with M-CSF for two days. Cells were stimulated with RANKL for additional four days and osteoclastogenesis assays were performed under hypoxia. Upper panel showed the representative images from three independent experiments. Lower panel shows pooled data from 3 experiments with different donors, normalized relative to the number of COMMD1-deficient osteoclasts treated with RANKL under hypoxia (set at 100%).

(G) Immunoblot with HIF1 $\alpha$  antibody of lysates from human macrophages transduced with adenoviral particles encoding GFP or COMMD1-HA and cultured either under normoxic or hypoxic conditions for three hours.  $\alpha$ -tubulin was used as a control. Representative images from three independent experiments.

(H-J) Human monocytes were nucleofected with control or COMMD1 siRNAs and cultured with M-CSF for two days. (H) Immunoblot with HIF1 $\alpha$  antibody. Cells were cultured either under normoxic or hypoxic conditions for three hours.  $\alpha$ -tubulin was used as a control. Representative images from three independent experiments. (I) Heat map of RNA-seq FPKM values for HIF1 $\alpha$  target genes (Benita et al., 2009) in control and COMMD1-deficient macrophages following RANKL stimulation for one day. RNA-seq data from two biological replicates were used. (J) *VEGF* mRNA expression was measured by qPCR.

Cumulative results from three independent experiments. Not significant for all lane comparison by one-way ANOVA.

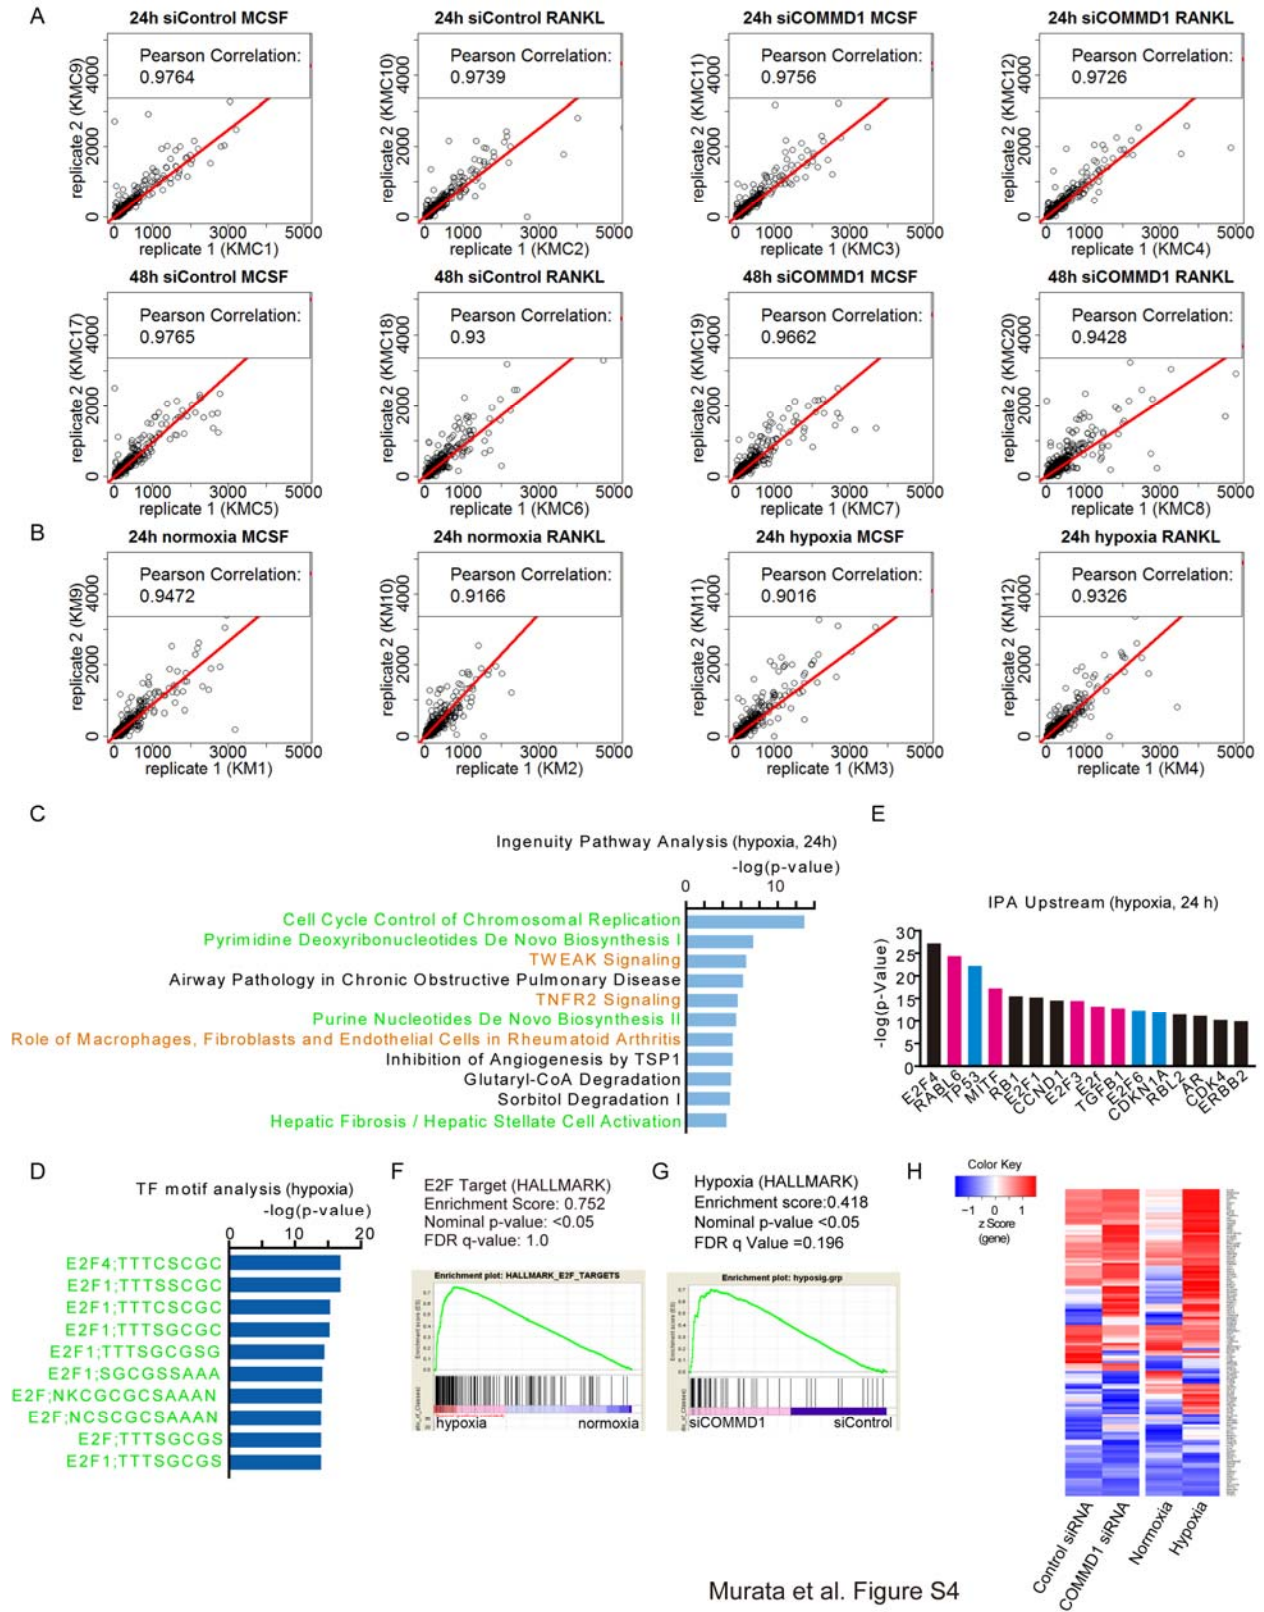

**Supplementary Figure 4. RNA-seq revealed COMMD1 and hypoxia reciprocally regulate cell cycle, metabolic and NF- $\kappa$ B target genes**, Related to Figure 5

(A) Pearson correlation analysis of COMMD1 silenced RNAseq (24 or 48 h of RANKL treatment) data obtained from two independent donors.

(B) Pearson correlation analysis of hypoxia RNAseq (24 h of RANKL treatment) data obtained from two independent donors.

(C, E) Ingenuity pathway analysis (Westra et al.) analysis of RANKL-inducible genes (24 h RANKL treatment) whose expression was superinduced by hypoxia.

(D) Enriched transcription factor binding motifs in RANKL-inducible hypoxia-dependent gene promoters, using gene set enrichment analysis (GSEA).

(F) GSEA showing significant enrichment of E2F target genes in the hypoxia-regulated gene set (24 h RANKL treatment) using two independent biological replicates.

(G) GSEA showing significant enrichment hypoxia target genes in the COMMD1-regulated gene set (48 h RANKL treatment) using two independent biological replicates.

(H) Heat map showing relative expression of HALLMARK\_hypoxia gene sets in Macrophages treated with COMMD1 siRNA (columns 1 and 2) or with hypoxia (columns 3 and 4).

The results are derived from analysis of two pooled biological replicates (C, D, E, H).



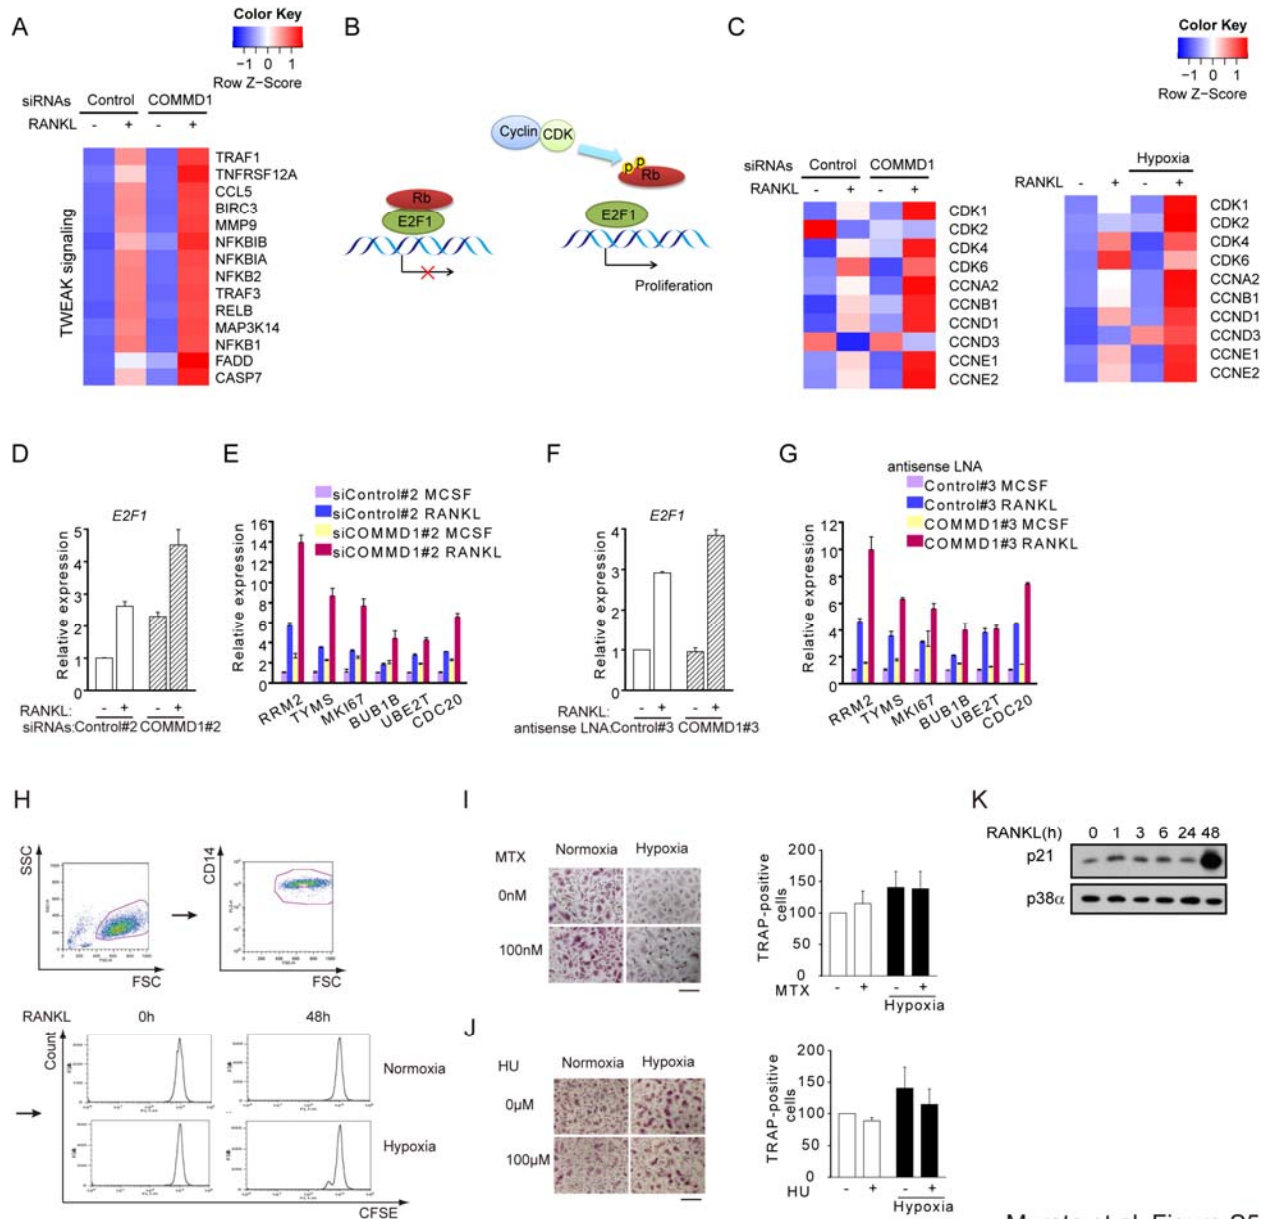

Murata et al. Figure S5

**Supplementary Figure 5. COMMD1 and hypoxia reciprocally regulate RANKL activation of NF-κB target genes and pRB-E2F1 pathway, Related to Figure 5**

(A) Heat map showing relative expression of TWEAK pathway genes in macrophages treated with COMMD1 siRNA. Results from pooled data from two biological replicates are shown.

(B) Schematic showing the mechanism of E2F1 activation. Binding of Rb protein with E2F1 inhibits E2F1 transcriptional activity. Phosphorylation of Rb protein by cyclin-CDK complex releases Rb from E2F1, releasing E2F1 from repression and enabling E2F1-mediated gene transcription.

(C) Heat map showing relative expression of cyclins and CDKs (24 h RANKL treatment). Results from pooled data from two biological replicates are shown.

(D-E) RT-qPCR analysis of mRNAs of *E2F1* or *E2F1*-specific target genes normalized relative to *TBP* mRNA using a second set of control or COMMD1-specific siRNAs.

(F-G) RT-qPCR analysis of mRNAs of *E2F1* or *E2F1*-specific target genes normalized relative to *TBP* mRNA using COMMD1-specific antisense or control LNA.

(H) Flow cytometric analysis of carboxyfluorescein succinimidyl ester (CFSE)-stained cells.  
(I-J) TRAP staining of human osteoclasts treated with methotrexate (MTX) or hydroxyurea (HU). Right panel shows pooled data from 3 experiments with different donors, normalized relative to the number of osteoclasts treated with RANKL alone under normoxia (set at 100%).  
(K) Immunoblot with p21 antibody of lysates from human macrophages treated with RANKL for the indicated times. p38 $\alpha$  was used as control. Representative images from 4 independent experiments. Bar graphs show means and error bars represent SEM. \*\* p<0.01. Bar, 200  $\mu$ m. The results are representative of at least 3 (D, E, F, G) and 3 (H, I, J) experiments.

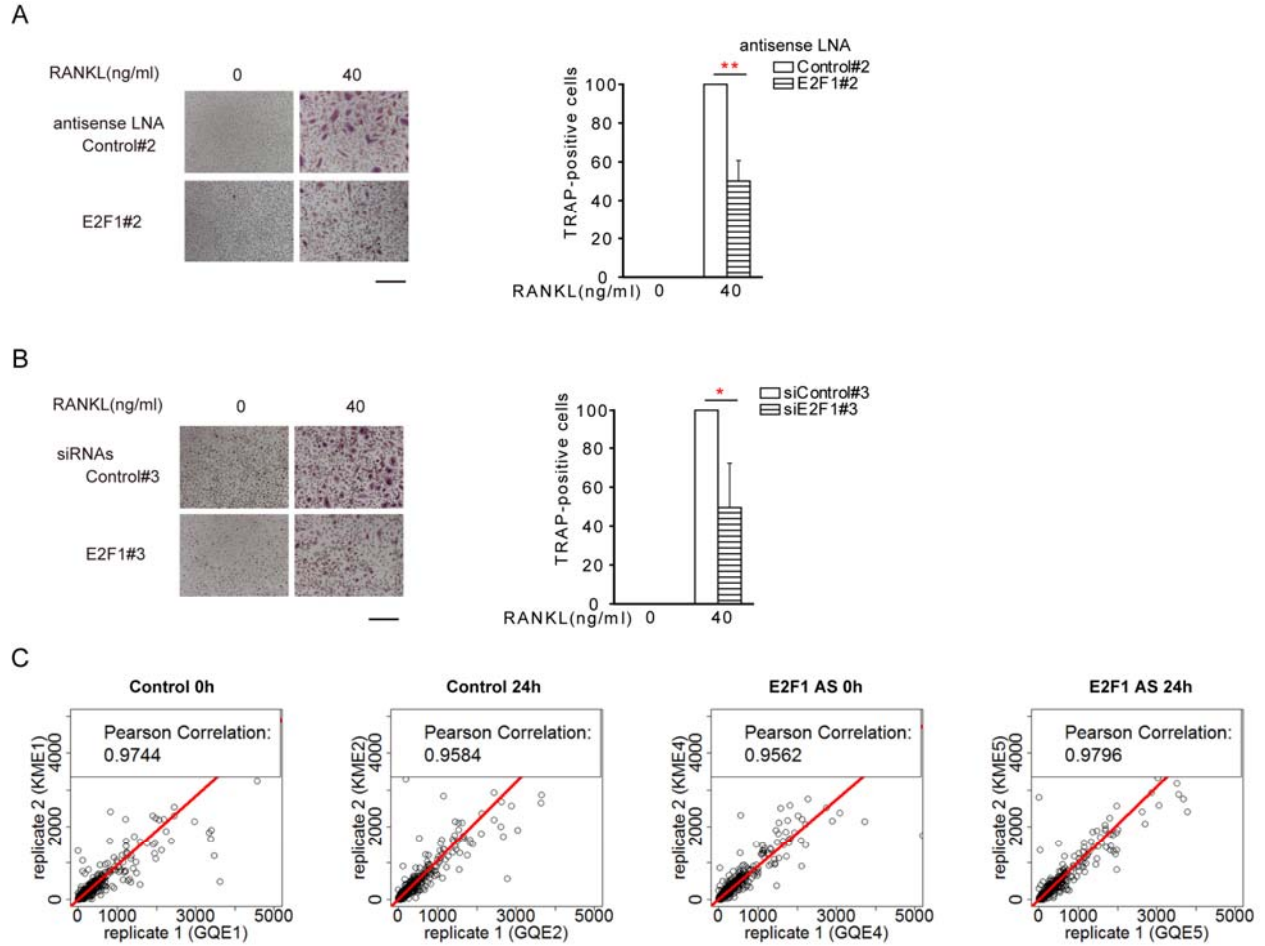

Murata et al. Figure S6

**Supplementary Figure 6. Osteoclastogenesis was positively regulated by E2F1 confirmed using additional sets of LNAs and siRNA, Related to Figure 6**

(A) TRAP staining of human osteoclasts nucleofected with a second set of control or E2F1-specific antisense LNAs. Right panel shows pooled data from 3 experiments with different donors normalized relative to the number of osteoclasts obtained using Control LNA#2 with RANKL (40 ng/ml) (set at 100%). (B) TRAP staining of human osteoclasts nucleofected with a set of control or E2F1-specific siRNAs. Right panel shows pooled data from 3 experiments with different donors normalized relative to the number of osteoclasts obtained using Control siRNA#3 with RANKL (40 ng/ml) (set at 100%). (C) Pearson correlation analysis of E2F1 silenced RNAseq (24 h of RANKL treatment) data obtained from two independent donors.

Bar graphs show means and error bars represent SEM. \*  $p < 0.05$ , \*\*  $p < 0.01$ . Bar, 200  $\mu\text{m}$ . The results are representative of 3 (A, B) experiments.

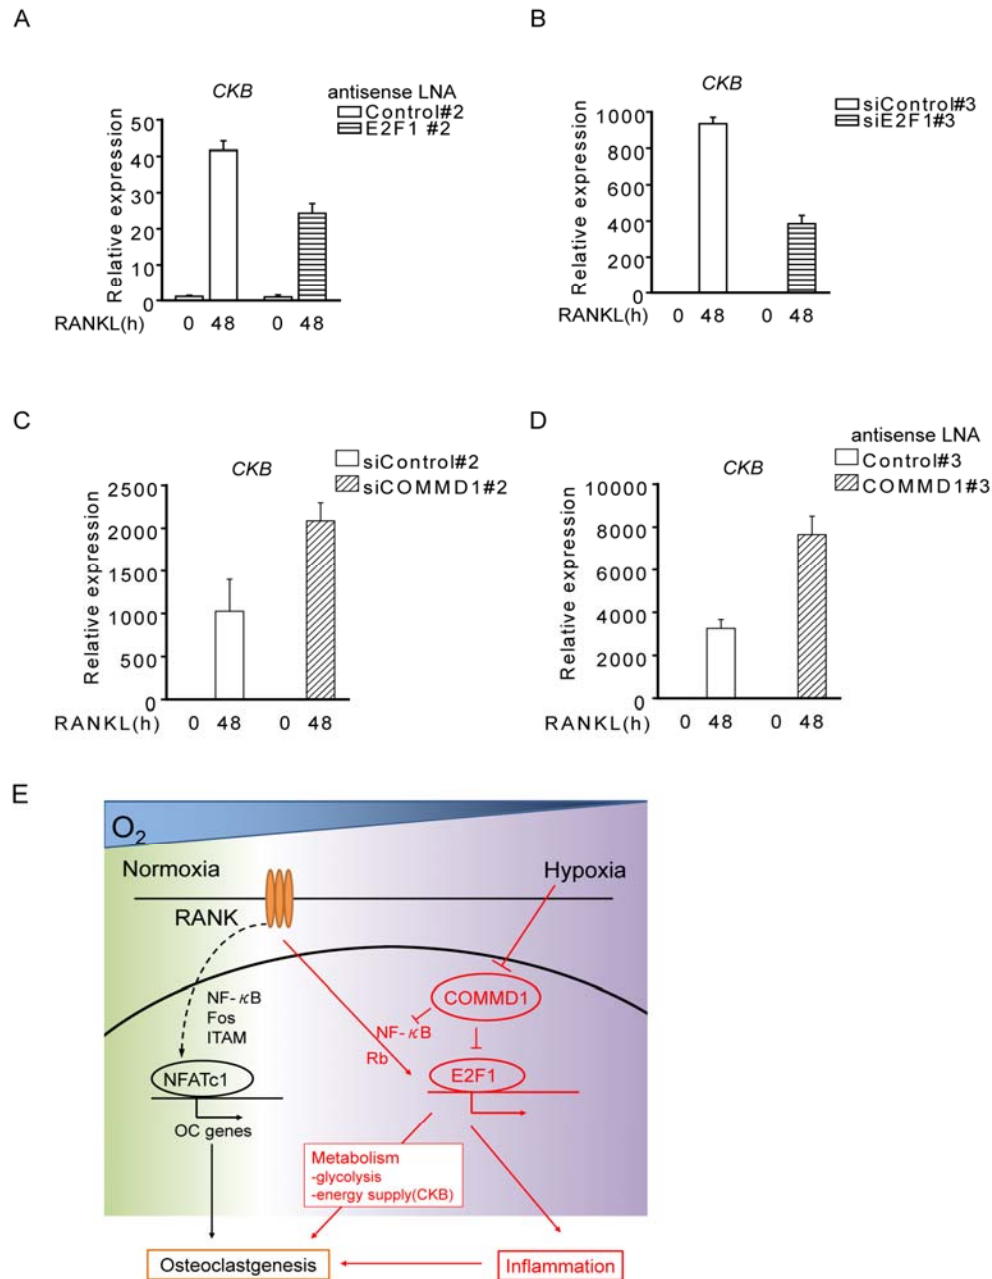

Murata et al. Figure S7

**Supplementary Figure 7. Regulation of CKB expression by COMMD1 and E2F1 confirmed using additional sets of siRNA or antisense LNA, Related to Figure 7.**

(A-D) RT-qPCR analysis of CKB mRNA normalized relative to TBP mRNA using additional sets of siRNAs or antisense LNAs. (E) Schematic showing the role of the COMMD1-E2F-metabolic pathway in osteoclastogenesis. Hypoxia suppresses COMMD1 to release the E2F-metabolic pathway from repression and thereby promote osteoclastogenesis. Bar graphs show means and error bars represent SEM. The results are representative of 2 (A) and 3 (B, C, D) experiments.

**Supplementary Table 1. Sequence of primers, siRNAs and antisense LNAs used in this study,**  
Related to STAR methods

| Real-time PCR primers | Sequences                |
|-----------------------|--------------------------|
| NFATc1 Fwd            | AAAGACGCAGAAACGACG       |
| NFATc1 Rev            | TCTCACTAACGGGACATCAC     |
| Itgb3 Fwd             | GGAAGAACGCGCCAGAGCAAAATG |
| Itgb3 Rev             | CCCCAAATCCCTCCCCACAAATAC |
| Ctsk Fwd              | CTCTTCCATTTCTTCCACGAT    |
| Ctsk Rev              | ACACCAACTCCCTTCCAAAG     |
| Ctr Fwd               | CTGAAGCTTGAGCGCCTGAGTC   |
| Ctr Rev               | TGGGGTTGGGTGATTTAGAAGAAG |
| COMMD1 Fwd            | CTGTTGCCATTATAGAGCTGGAA  |
| COMMD1 Rev            | GCGTCTTCAGAATTTGGTTGACT  |
| E2F1 Fwd              | TGCAGAGCAGATGGTTATGG     |
| E2F1 Rev              | CTGATCCCACCTACGGTCTC     |
| RRM2 Fwd              | AGCCCACGGAGCCGAAAACCT    |
| RRM2 Rev              | CGGCGGTCCAAAAGGAAGCC     |
| TYMS Fwd              | AGTACCTGGGGCAGATCCAACAC  |
| TYMS Rev              | CGTTTGGTTGTCAGCAGAGGGA   |
| MKI67 Fwd             | CCGGATCGTCCCAGTGGAAG     |
| MIK67 Rev             | AAAGTGGGGACCGTCGACCC     |
| BUB1B Fwd             | TAGCTCCGAGGGCAGGTTGC     |
| BUB1B Rev             | ATGGCTTCACTCAGAGCACCCC   |
| UBE2T Fwd             | TGCCACCAAAGGTGCTTGA      |
| UBE2T Rev             | AGCGGGTCATCAGGGTTGGG     |
| CDC20 Fwd             | CCCATGGCACAGTTCGCGTT     |

|                    |                                                           |
|--------------------|-----------------------------------------------------------|
| CDC20 Rev          | GATTTGCCAGGAGTTCGGCC                                      |
| CKB Fwd            | ACCGGCCTCACCCAGATTGA                                      |
| CKB Rev            | AGCCGCTTAAGCACCTCCGA                                      |
| siRNAs             |                                                           |
| COMMD1#1           | AGUCUAUUGCGUCUGCAGAtt                                     |
|                    | UCUGCAGACGCAAUAGACUta                                     |
| COMMD1#2           | CUUGACUGCUCAAACCAAAtt                                     |
|                    | UUUGGUUUGAGCAGUCAAGaa                                     |
| E2F1#3             | GUCACGCUAUGAGACCUCAtt                                     |
|                    | UGAGGUCUCAUAGCGUGACTt                                     |
| Control #1         | Ambion proprietary information<br>Product number: 4390843 |
| Control #2         | Ambion proprietary information<br>Product number: 4390846 |
| antisense LNA      |                                                           |
| COMMD1#3           | TGCAGACGCAATAGA                                           |
| E2F1#1             | GGTGGTCAGATTCAGT                                          |
| E2F1#2             | GATTCAGTGAGGTCT                                           |
| Negative control A | AACACGTCTATACGC                                           |
| Negative control B | GCTCCCTTCAATCCAA                                          |
